# Supplementary material for: Oligonucleotide Delivery across the Caco-2 Monolayer: The Design and Evaluation of Self-Emulsifying Drug Delivery Systems (SEDDS)
Source: MDPI journal article supplement (doi:10.3390/pharmaceutics13040459), 2021-03-28
Supplement: s1 [file s1]

# Supplementary Materials: Oligonucleotide Delivery across the Caco-2 Monolayer: The Design and Evaluation of Self-Emulsifying Drug Delivery Systems (SEDDS)

Jana Kubackova, Ondrej Holas, Jarmila Zbytovska, Barbora Vranikova, Guanghong Zeng, Petr Pavek and Anette Mullertz

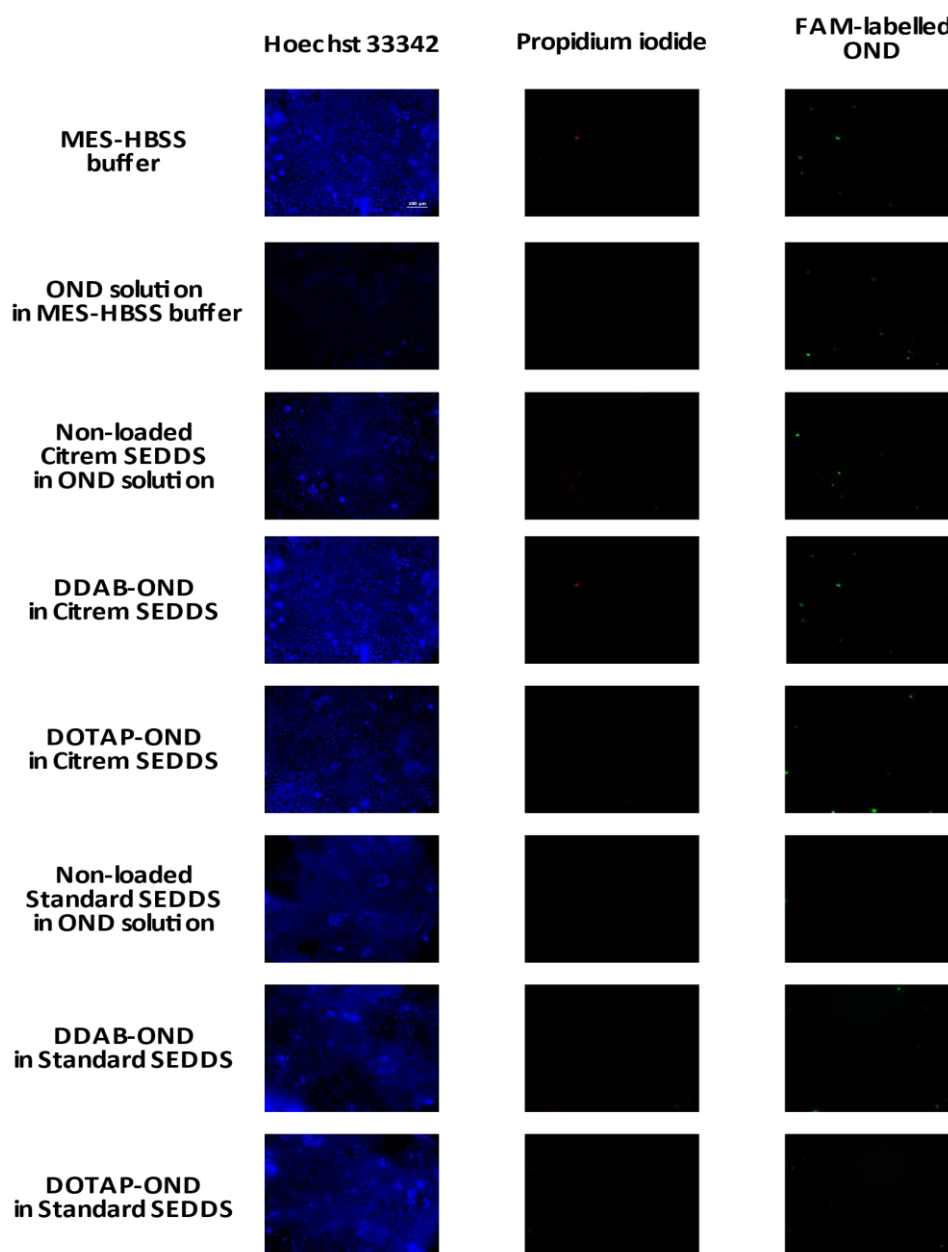

**Figure S1.** Fluorescence microscope images. Images show blue Hoechst 33342 staining of cell nuclei, red propidium iodide dye showing dead cells and green FAM-labeled OND. The scale in the first image represents 100  $\mu$ m and is applicable to all images. OND-oligonucleotide, SEDDS -self-emulsifying drug delivery system.
